# Supplementary material for: Ultrasensitive optical thermometry using Tb3+ doped NaSrGd(MoO4)3 based on single band ratiometric luminescence
Source: Royal Society of Chemistry journal article supplement (doi:10.1039/d3dt00376k), 2023-01-01
Supplement: d3dt00376k1.pdf [file d3dt00376k1.pdf]

## Electronic supplementary information

**Ultrasensitive optical thermometry via Tb<sup>3+</sup> doped NaSrGd(MoO<sub>4</sub>)<sub>3</sub> based on single band ratiometric luminescence.**

**Zein El Abidine Aly Taleb<sup>1</sup>, Kamel Saidi<sup>1\*</sup>, Mohamed. Dammak<sup>1</sup>, Dominika Przybylska,  
Tomasz Grzyb<sup>2</sup>**

<sup>1</sup> Laboratoire de Physique Appliquée, Groupe des Matériaux Luminescents, Faculté des Sciences de Sfax, Département de Physique, Université de Sfax, BP, 1171 Sfax, Tunisia.

<sup>2</sup> Department of Rare Earths, Faculty of Chemistry, Adam Mickiewicz University in Poznań, Uniwersytetu Poznańskiego 8, 61-614 Poznan, Poland.

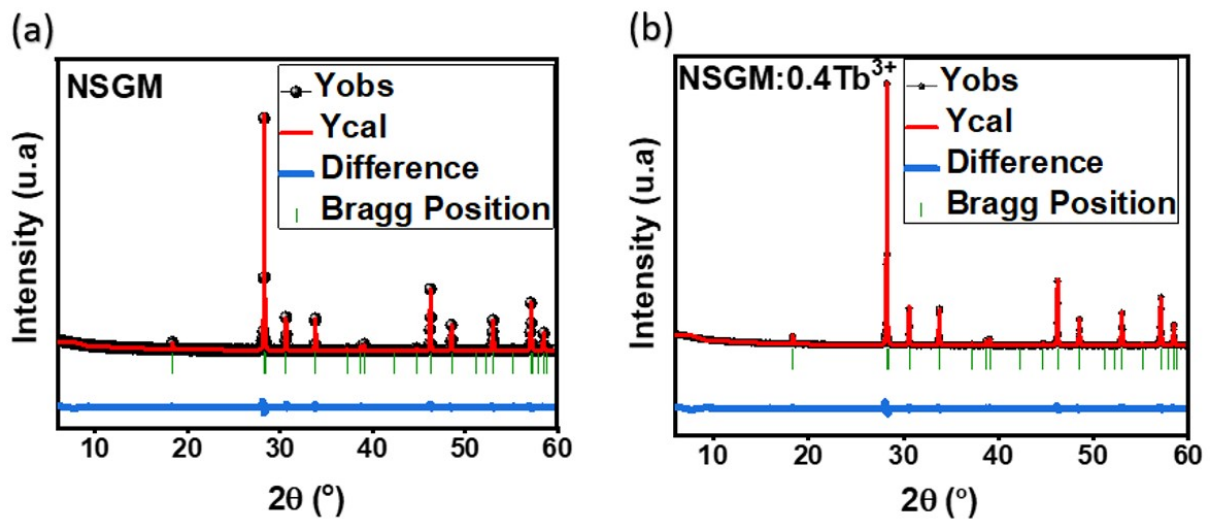

Fig.S<sub>1</sub> a and b. Rietveld refinement patterns of NSGM.

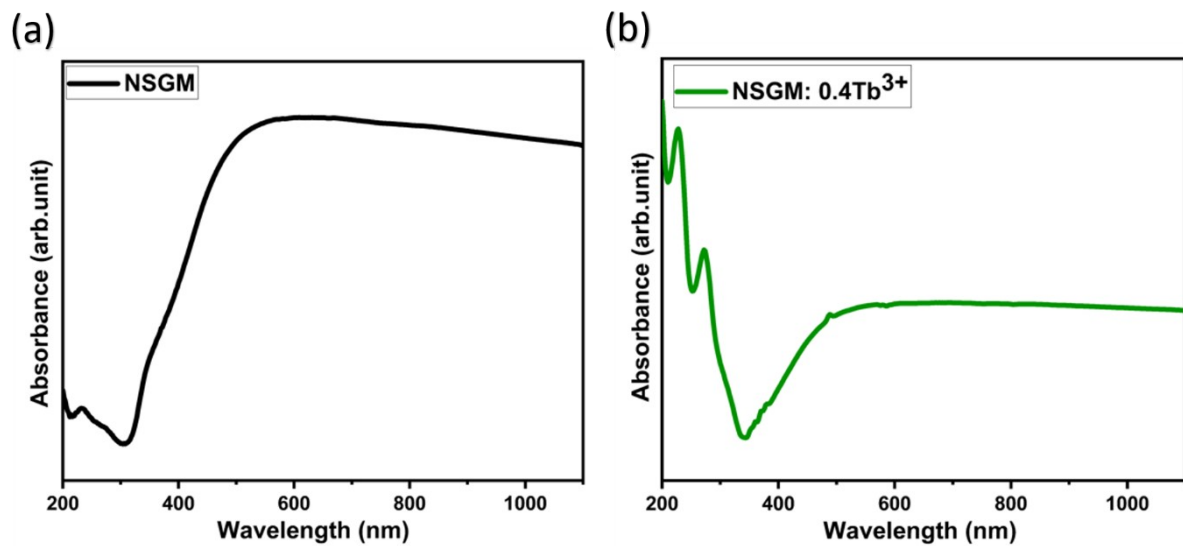

Fig.S<sub>2</sub> a and b. Diffuse reflectance spectra (a) of NSGM and (b) for NSGM: 0.4Tb<sup>3+</sup>.

**Table S<sub>1</sub>.** Refinement parameters of NSGM and NSGM:0.4Tb<sup>3+</sup> phosphors.

| <b>Compound</b>                             | <b>NSGM</b> | <b>NSGM:0.4Tb<sup>3+</sup></b> |
|---------------------------------------------|-------------|--------------------------------|
| <b>Crystal system</b>                       | Tetragonal  | Tetragonal                     |
| <b>Space group</b>                          | I41/a (88)  | I41/a (88)                     |
| <b>a &amp; b (Å)</b>                        | 5.3024      | 5.3021                         |
| <b>c (Å)</b>                                | 11.6693     | 11.6686                        |
| <b><math>\alpha = \beta = \gamma</math></b> | 90°         | 90°                            |
| <b>V (Å<sup>3</sup>)</b>                    | 328.09      | 328.06                         |
| <b>Rwp, %</b>                               | 11.24       | 12.64                          |
| <b><math>\chi^2</math></b>                  | 1.78        | 2.04                           |

**Table S<sub>2</sub>.** Chromaticity coordinates, Purity of color and CCT color temperature for the NSGM: xTb<sup>3+</sup>(x=0.1, 0.2, 0.3, 0.4, 0.5 and 0.6).

| <b>Doping rate</b> | <b>X</b> | <b>Y</b> | <b>CCT ( K )</b> | <b>Color purity</b> |
|--------------------|----------|----------|------------------|---------------------|
| <b>10%</b>         | 0.3230   | 0.6387   | 5655             | 92.3%               |
| <b>20%</b>         | 0.3071   | 0.6295   | 5913             | 81.7%               |
| <b>30%</b>         | 0.3212   | 0.6309   | 5517             | 86.3%               |
| <b>40%</b>         | 0.3137   | 0.6309   | 5805             | 84.1%               |
| <b>50%</b>         | 0.3137   | 0.6306   | 5808             | 84%                 |
| <b>60%</b>         | 0.3303   | 0.6142   | 5544             | 83.7%               |
